# Supplementary material
Source: Springer Nature journal article supplement (https://www.springermedizin.de/resource/supplementary/13027_2009_161_MOESM6_ESM.pdf/25656558)
Supplement: MOESM6 [file 25656558]

| <b>Virus family</b>   | <b>Virus</b>    | <b>Human tumors</b>                                                                                          | <b>Vaccine</b> |
|-----------------------|-----------------|--------------------------------------------------------------------------------------------------------------|----------------|
| <b>Papovaviridae</b>  | <b>HPV16/18</b> | <b>Cervical, Anogenital and Oesophagus tumors</b>                                                            | <b>✓</b>       |
|                       | <b>JCV</b>      | <b>Brain and Colon tumors</b>                                                                                |                |
|                       | <b>SV40</b>     | <b>Mesothelioma and Colon tumors</b>                                                                         |                |
| <b>Hepadnaviridae</b> | <b>HBV</b>      | <b>Hepatocellular carcinoma</b>                                                                              | <b>✓</b>       |
| <b>Flaviviridae</b>   | <b>HCV</b>      | <b>Hepatocellular carcinoma</b>                                                                              |                |
| <b>Herpesviridae</b>  | <b>EBV</b>      | <b>Nasopharyngeal carcinoma, Burkitt's lymphoma, Hodgkin's lymphoma, B-cell lymphoproliferative diseases</b> |                |
|                       | <b>HHV-8</b>    | <b>Kaposi's sarcoma, Primary effusion lymphoma</b>                                                           |                |
| <b>Retroviridae</b>   | <b>HTLV-1</b>   | <b>Adult T-cell leukemia</b>                                                                                 |                |
